# Supplementary material for: Oxo-centered carboxylate-bridged trinuclear complexes deposited on Au(111) by a mass-selective electrospray
Source: Royal Society of Chemistry journal article supplement (doi:10.1039/c1nj20080a), 2011-01-01
Supplement: c1nj20080a.pdf [file c1nj20080a.pdf]

## SUPPLEMENTARY INFORMATION

### Oxo-centered carboxylate-bridged trinuclear complexes deposited on Au(111) by a mass-selective electrospray.

Valdis Corradini, Cristian Cervetti, Alberto Ghirri, Roberto Biagi, Umberto del Pennino,  
Grigore A. Timco, Richard E. P. Winpenny and Marco Affronte

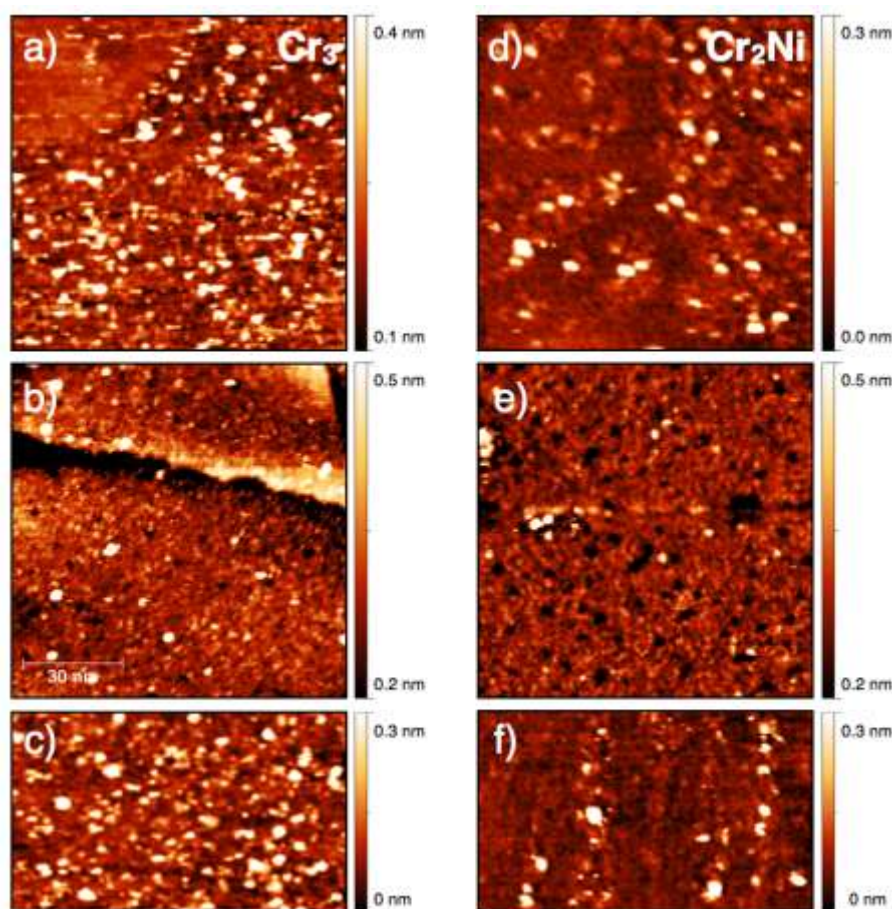

Fig. 1S. STM images showing the deposition of trimers of Cr<sub>3</sub> (panels a, b and c) and Cr<sub>2</sub>Ni (panels d, e and f) on gold. The results of the ESI-PF method are shown in panels a) and d) while panels b) and e) show the results of the ESI-MF method. The STM images in panels c) and f) are taken after immersion of Au/mica surfaces onto respectively Cr<sub>3</sub>/tetrahydrofuran ( $3 \times 10^{-4}$  M) and Cr<sub>2</sub>Ni/dichloromethane ( $10^{-3}$  M) solutions and rinse with solvent. For all images the tunneling current is 30 pA and the bias voltage 2 V.
